# Supplementary material for: Simultaneous Multiplexed Quantification of Banned Sudan Dyes Using Surface Enhanced Raman Scattering and Chemometrics
Source: MDPI journal article supplement (doi:10.3390/s22207832), 2022-10-15
Supplement: s1 [file s1]

# Simultaneous multiplexed quantification of banned Sudan dyes using surface enhanced Raman scattering and chemometrics

Taghrid S. Alomar<sup>1,2</sup>, Najla AlMasoud<sup>1,2</sup>, Yun Xu<sup>2</sup>, Cassio Lima<sup>2</sup>, **Baris Akbali<sup>3,4</sup>**, **Simon Maher<sup>3</sup>**, Royston Goodacre<sup>2</sup>

<sup>1</sup> Department of Chemistry, College of Science, Princess Nourah bint Abdulrahman University, Riyadh 11671, Saudi Arabia

<sup>2</sup> Centre for Metabolomics Research, Department of Biochemistry and Systems Biology, Institute of Systems, Molecular and Integrative Biology, University of Liverpool, Biosciences Building, Crown Street, Liverpool L69 7ZB, UK

<sup>3</sup> Department of Electrical Engineering and Electronics, University of Liverpool, Brownlow Hill, Liverpool, L69 3GJ, UK

<sup>4</sup> Department of Engineering and System Science, National Tsing Hua University, Hsinchu 30013, Taiwan

\* Correspondence: roy.goodacre@liverpool.ac.uk;

## Supplementary Materials

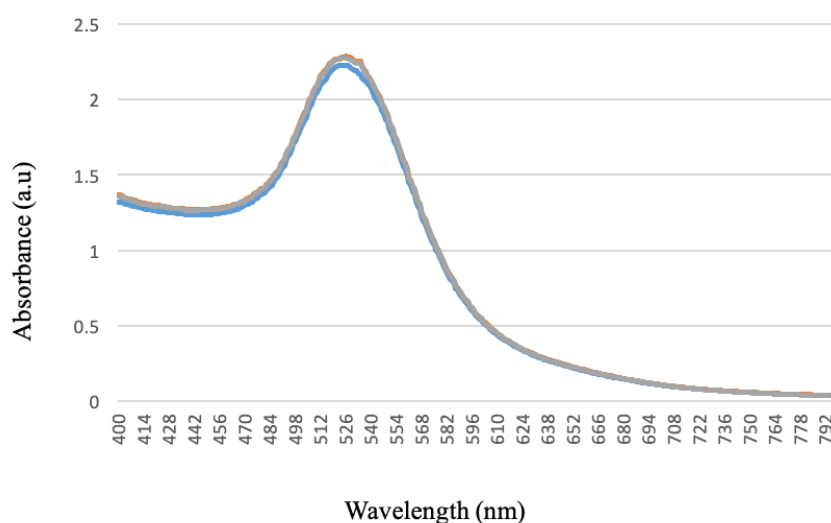

**Figure S1:** UV–Visible absorption spectra of the citrate reduced gold nanoparticles.

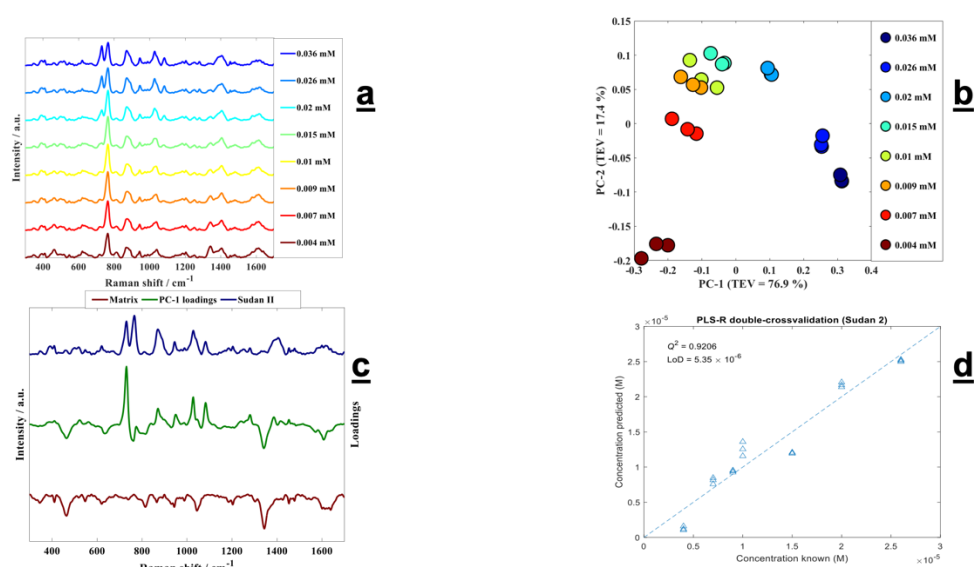

**Figure S2:** (a) SERS spectra of Sudan II shows different concentrations and spectra are offset for clarity; (b) PCA scores plot of Sudan II, the colours represent the concentrations, and the details are provided within the figure; (c) PC1 loadings plot (green), with Sudan II (blue) and matrix, aggregation agent (0.5M NaCl) and gold nanoparticles, (in brown and multiplied by -1 (i.e. inverted) for clarity); (d) PLS-R predictions of Sudan II, these models used double-cross validation.

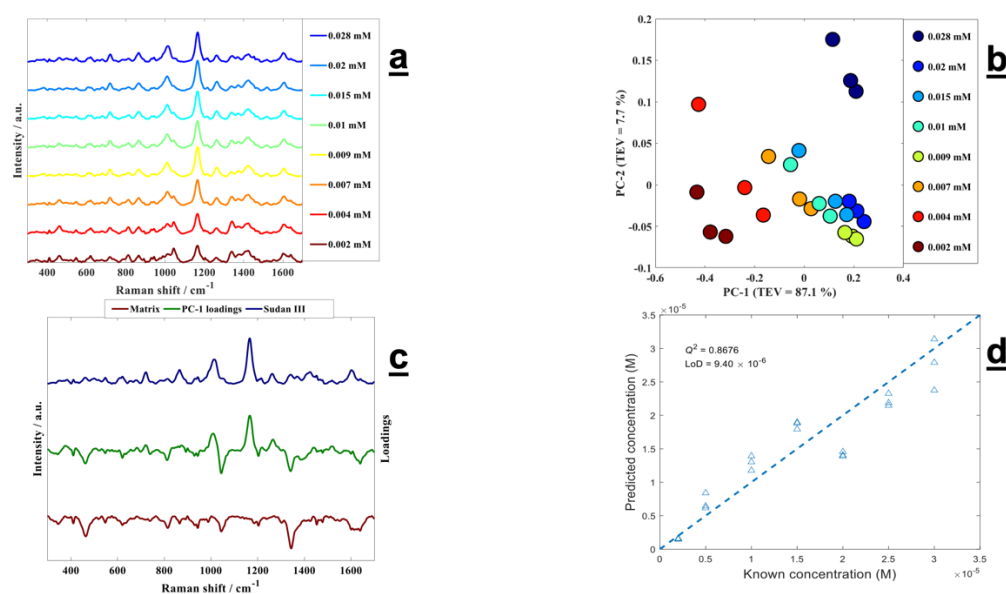

**Figure S3:** (a) SERS spectra of Sudan III shows different concentrations and spectra are offset for clarity; (b) PCA scores plot of Sudan III, the colours represent the concentrations, and the details are provided within the figure; (c) PC1 loadings plot (green), with Sudan III (blue) and matrix, aggregation agent (0.5M NaCl) and gold nanoparticles, (in brown and multiplied by -1 (i.e. inverted) for clarity); (d) PLS-R predictions of Sudan III, these models used double-cross validation.

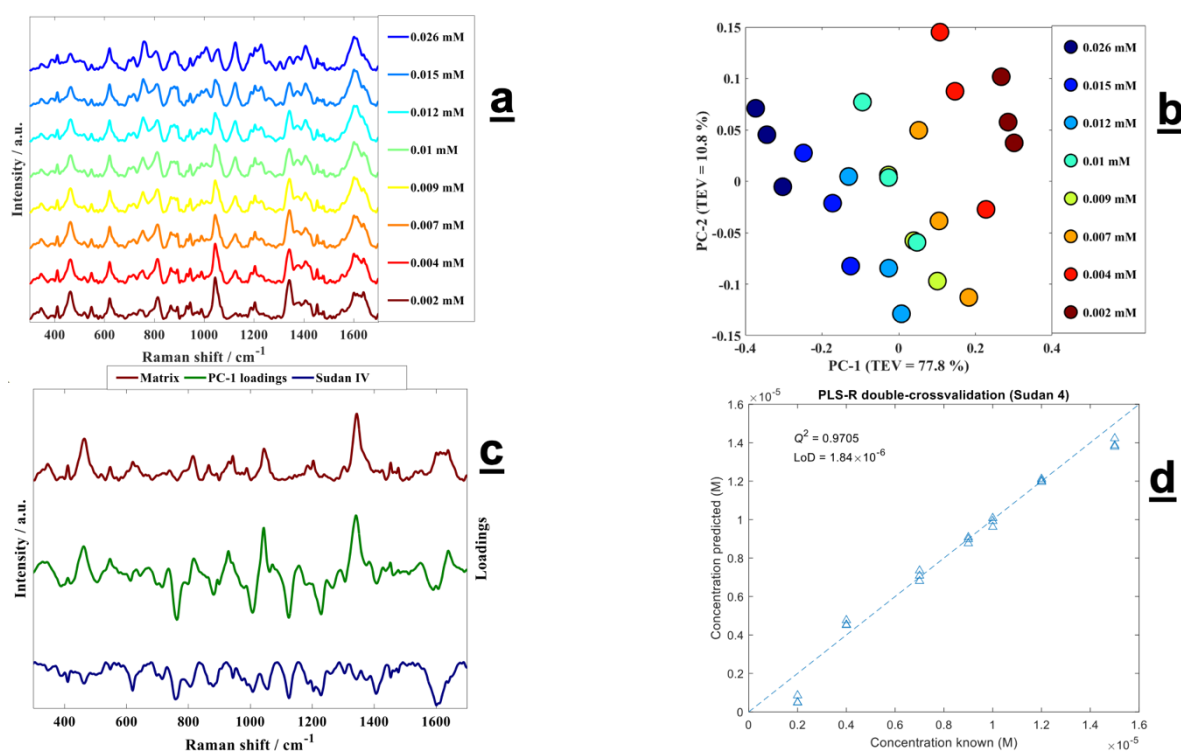

**Figure S4:** (a) SERS spectra of Sudan IV shows different concentrations and spectra are offset for clarity; (b) PCA scores plot of Sudan IV, the colours represent the concentrations, and the details are provided within the figure; (c) PC1 loadings plot (green), with Sudan IV (blue) and matrix, aggregation agent (0.5M NaCl) and gold nanoparticles, (in brown and multiplied by -1 (i.e. inverted) for clarity); (d) PLS-R predictions of Sudan IV, these models used double-cross validation.

**Table S1:** Latin Hypercubic Sampling of combination Sudan dyes I-IV

| Sample | Sudan I | Sudan II | Sudan III | Sudan IV | Sample | Sudan I | Sudan II | Sudan III | Sudan IV |
|--------|---------|----------|-----------|----------|--------|---------|----------|-----------|----------|
| 1      | 0       | 60       | 30        | 50       | 46     | 50      | 60       | 60        | 65       |
| 2      | 0       | 65       | 50        | 75       | 47     | 50      | 80       | 10        | 95       |
| 3      | 0       | 85       | 90        | 15       | 48     | 55      | 5        | 80        | 20       |
| 4      | 5       | 5        | 85        | 20       | 49     | 55      | 70       | 60        | 100      |
| 5      | 5       | 15       | 5         | 80       | 50     | 55      | 75       | 5         | 30       |
| 6      | 5       | 15       | 45        | 10       | 51     | 55      | 85       | 30        | 80       |
| 7      | 5       | 100      | 10        | 70       | 52     | 55      | 90       | 40        | 55       |
| 8      | 10      | 15       | 60        | 25       | 53     | 60      | 0        | 95        | 50       |
| 9      | 10      | 20       | 75        | 15       | 54     | 60      | 50       | 15        | 25       |
| 10     | 10      | 25       | 45        | 5        | 55     | 60      | 65       | 40        | 5        |
| 11     | 10      | 85       | 30        | 70       | 56     | 60      | 70       | 15        | 45       |
| 12     | 15      | 20       | 70        | 60       | 57     | 60      | 90       | 90        | 85       |
| 13     | 15      | 45       | 65        | 75       | 58     | 65      | 10       | 65        | 10       |
| 14     | 15      | 50       | 40        | 35       | 59     | 65      | 75       | 35        | 5        |
| 15     | 15      | 55       | 95        | 60       | 60     | 65      | 95       | 35        | 35       |

|    |    |    |     |     |    |     |     |     |    |
|----|----|----|-----|-----|----|-----|-----|-----|----|
| 16 | 15 | 80 | 100 | 45  | 61 | 70  | 5   | 0   | 45 |
| 17 | 20 | 10 | 25  | 90  | 62 | 70  | 40  | 30  | 20 |
| 18 | 20 | 20 | 45  | 55  | 63 | 70  | 60  | 75  | 10 |
| 19 | 20 | 20 | 80  | 95  | 64 | 70  | 80  | 100 | 65 |
| 20 | 20 | 65 | 50  | 55  | 65 | 70  | 90  | 85  | 30 |
| 21 | 25 | 25 | 45  | 30  | 66 | 75  | 0   | 80  | 80 |
| 22 | 25 | 55 | 60  | 45  | 67 | 75  | 35  | 90  | 80 |
| 23 | 25 | 80 | 55  | 50  | 68 | 75  | 40  | 10  | 95 |
| 24 | 25 | 85 | 25  | 15  | 69 | 75  | 95  | 15  | 5  |
| 25 | 30 | 20 | 85  | 20  | 70 | 75  | 100 | 55  | 45 |
| 26 | 30 | 30 | 5   | 90  | 71 | 80  | 30  | 85  | 60 |
| 27 | 30 | 30 | 15  | 100 | 72 | 80  | 70  | 80  | 40 |
| 28 | 30 | 35 | 20  | 75  | 73 | 80  | 75  | 55  | 25 |
| 29 | 30 | 45 | 65  | 65  | 74 | 80  | 75  | 90  | 65 |
| 30 | 30 | 45 | 75  | 70  | 75 | 80  | 80  | 20  | 85 |
| 31 | 35 | 65 | 5   | 60  | 76 | 85  | 30  | 75  | 85 |
| 32 | 35 | 85 | 40  | 40  | 77 | 85  | 55  | 10  | 25 |
| 33 | 35 | 90 | 30  | 85  | 78 | 85  | 60  | 50  | 75 |
| 34 | 40 | 5  | 95  | 5   | 79 | 85  | 70  | 0   | 70 |
| 35 | 40 | 10 | 65  | 30  | 80 | 90  | 10  | 5   | 0  |
| 36 | 40 | 25 | 70  | 15  | 81 | 90  | 35  | 70  | 0  |
| 37 | 40 | 50 | 35  | 95  | 82 | 90  | 40  | 60  | 40 |
| 38 | 40 | 95 | 85  | 85  | 83 | 90  | 45  | 95  | 40 |
| 39 | 45 | 30 | 20  | 95  | 84 | 95  | 45  | 30  | 35 |
| 40 | 45 | 35 | 40  | 65  | 85 | 95  | 50  | 55  | 15 |
| 41 | 45 | 50 | 70  | 90  | 86 | 95  | 70  | 75  | 55 |
| 42 | 45 | 55 | 25  | 35  | 87 | 95  | 95  | 15  | 35 |
| 43 | 50 | 5  | 25  | 50  | 88 | 95  | 95  | 20  | 90 |
| 44 | 50 | 20 | 55  | 20  | 89 | 100 | 15  | 50  | 55 |
| 45 | 50 | 40 | 35  | 75  | 90 | 100 | 35  | 95  | 10 |

The values in the table are percentages that represent those of the different ranges from each of the dyes:

Sudan I is 0.048 – 0.002 mM

Sudan II: 0.036 – 0.004 mM

Sudan III: 0.028 – 0.002 mM

Sudan IV: 0.026 – 0.002 mM

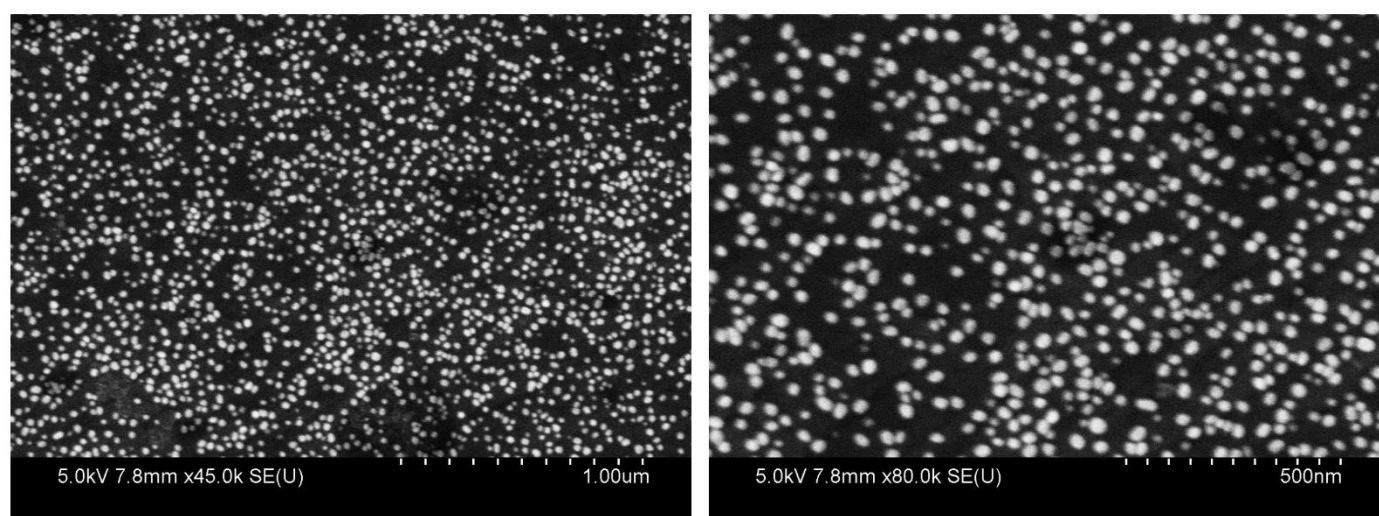

**Figure S5:** SEM micrographs acquired from gold nanoparticles bound to stainless steel substrate. The scale bars and magnification are inset in each of the images.

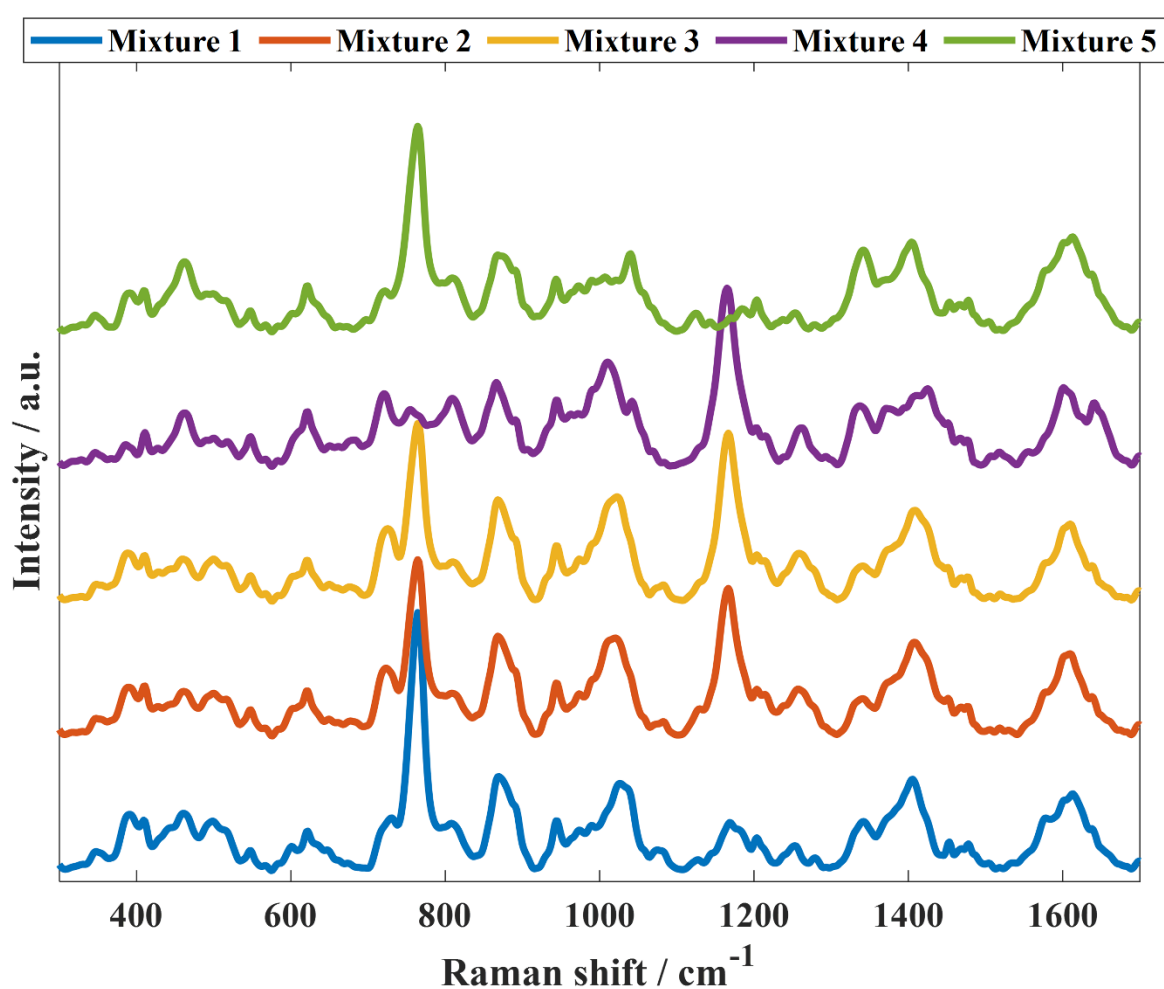

**Figure S6:** SERS spectra acquired from quadruplex mixtures. Mixture 1 (sample 1 in table S1); Mixture 2 (sample 2 in table S1); Mixture 3 (sample 3 in table S1); Mixture 4 (sample 4 in table S1); Mixture 5 (sample 5 in table S1).
